# Supplementary material for: Rectal cancer sub-clones respond differentially to neoadjuvant therapy
Source: PubMed Central journal article supplement — Neoplasia. 2019 Sep 12;21(10):1051–62. doi: 10.1016/j.neo.2019.08.004 (PMC6745489; doi:10.1016/j.neo.2019.08.004), 2019-09-12

# NP01, 56 variant genes

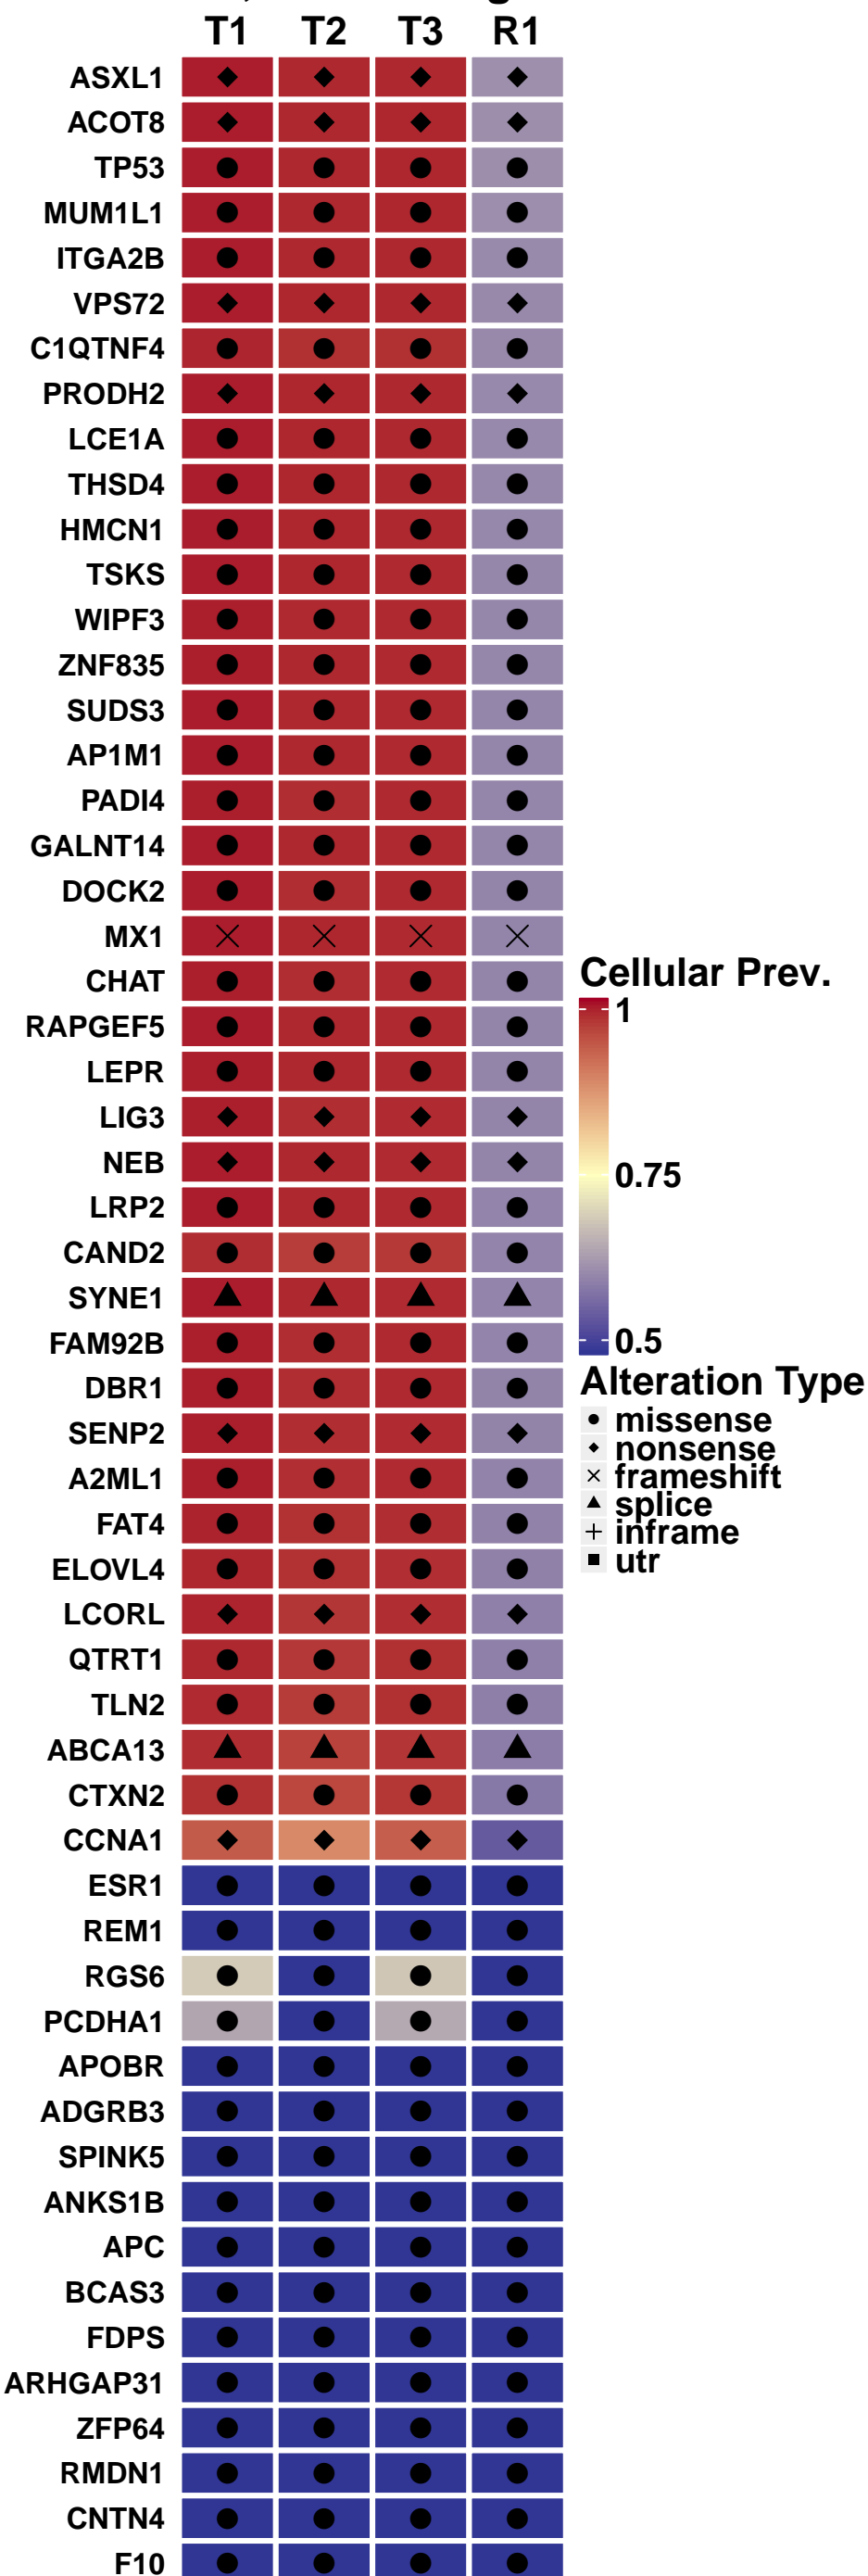

# NP04, 134 variant genes

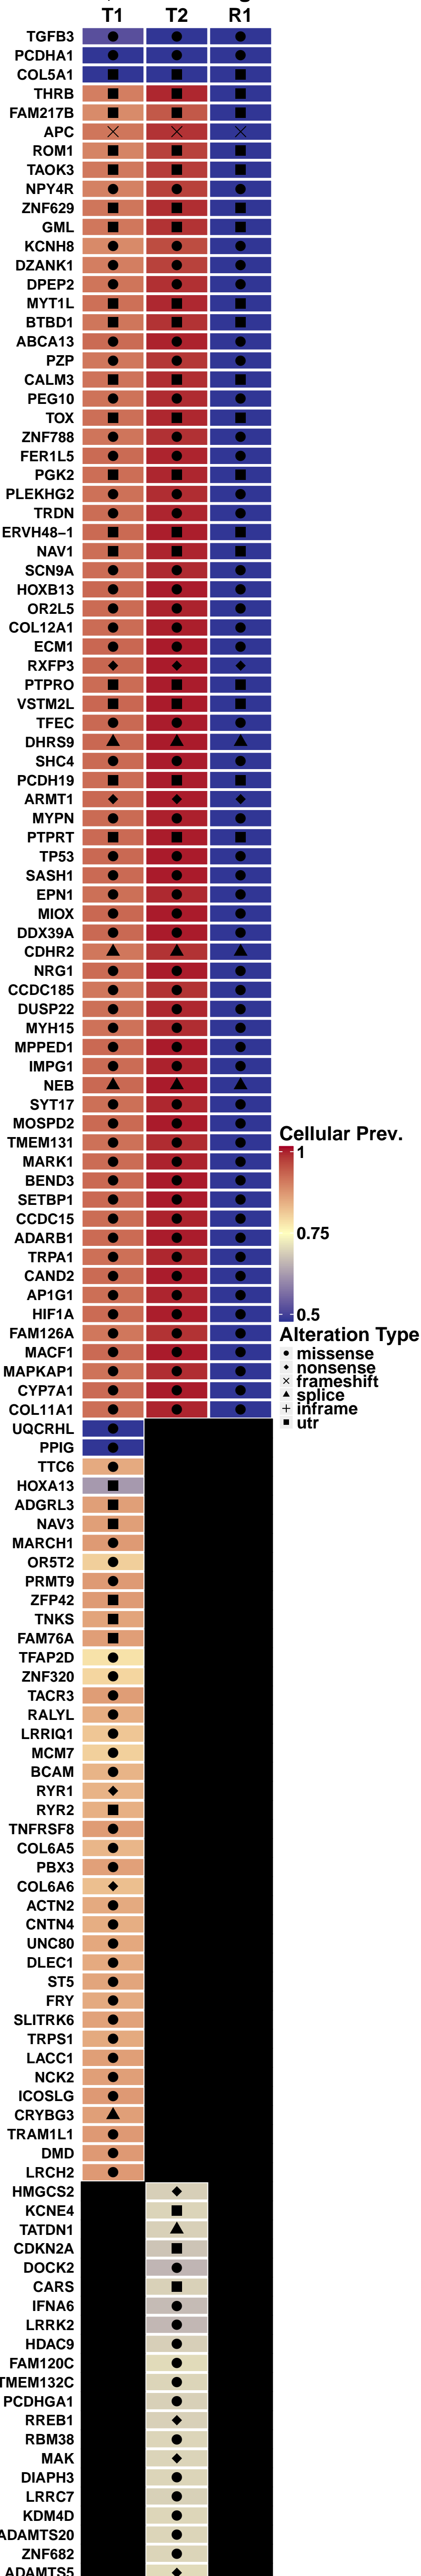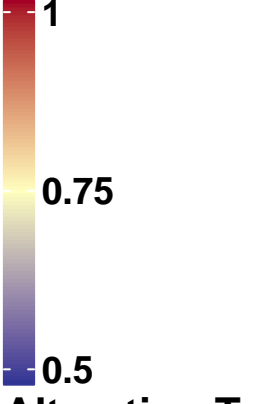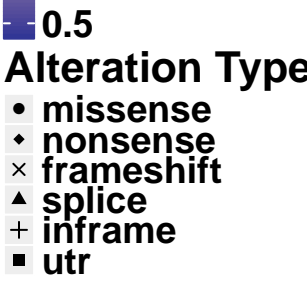

# NP10, 272 variant genes

T1 T2 T3 T4 R1

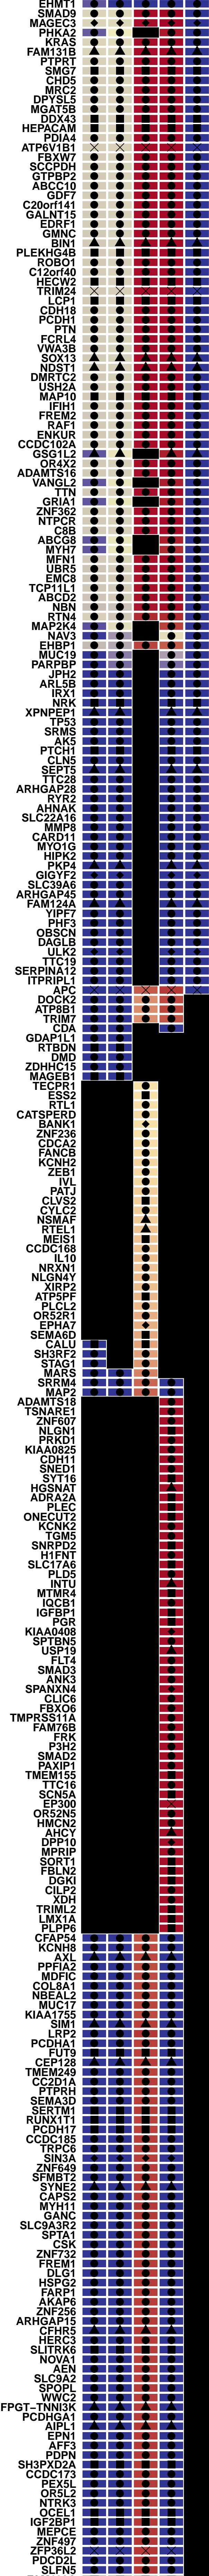

APOBR  
ATP11C  
EHMT1  
SMAD9  
MAGEC3  
PKA2  
KRAS  
FAM131B  
PTPRT  
SMG7  
CHD5  
MRC2  
DPYSL5  
MGAT5B  
DDX43  
HEPACAM  
PDIA4  
ATP6V1B1  
FBXW7  
SCCPDH  
GTPBP2  
ABCC10  
GDF7  
C20orf141  
GALNT15  
EDRF1  
GMNC  
BIN1  
PLEKHG4B  
ROBO1  
C12orf40  
HECW2  
TRIM24  
LCP1  
CDH18  
PCDH1  
PTN  
FCRL4  
VWA3B  
SOX13  
NDST1  
DMRTC2  
USH2A  
MAP10  
IFIH1  
FREM2  
RAF1  
ENKUR  
CCDC102A  
GSG1L2  
OR4X2  
ADAMTS16  
VANGL2  
TTN  
GRIA1  
ZNF362  
NTPCR  
C8B  
ABCG8  
MYH7  
MFN1  
UBR5  
EMC8  
TCP11L1  
ABCD2  
NBN  
RTN4  
MAP2K4  
NAV3  
EHBP1  
MUC19  
PARPBP  
JPH2  
ARL5B  
IRX1  
NRK  
XPNPEP1  
TP53  
SRMS  
AK5  
PTCH1  
CLN5  
SEPT5  
TTC28  
ARHGAP28  
RYSR2  
AHNAK  
SLC22A16  
MMP8  
CARD11  
MYO1G  
HIPK2  
PKP4  
GIGYF2  
SLC39A6  
ARHGAP45  
FAM124A  
YIPF3  
PHF3  
OBSCN  
DAGLB  
ULK2  
TTC19  
SERPINA12  
ITPR1L1  
APC  
DOCK2  
ATP8B1  
TRIM7  
CDA  
GDAP1L1  
RTBDN  
DMD  
ZDHHC15  
MAGEB1  
TECPR1  
ESS2  
RTL1  
CATSPERD  
BANK1  
ZNF236  
CACA2  
FANCB  
KCNH2  
ZEB1  
IVL  
PATJ  
CLVS2  
CYLC2  
NSMAF  
RTEL1  
MEIS1  
CCDC168  
IL10  
NRXN1  
NLGN4Y  
XIRP2  
ATP5PF  
PLCL2  
OR52R1  
EPAH7  
SEMA6D  
CALU  
SH3RF2  
STAG1  
MARS  
SRRM4  
MAP2  
ADAMTS18  
TSNARE1  
ZNF607  
NLGN1  
PRKD1  
KIAA0825  
CDH11  
SNED1  
SYT16  
HGSNAT  
ADRA2A  
PLEC  
ONCUT2  
KCNK2  
TGM5  
SNRPD2  
H1FNT  
SLC17A6  
PLD5  
INTU  
MTMR4  
IQCB1  
IGFBP1  
PGR  
KIAA0408  
SPTBN5  
USP19  
FLT4  
SMAD3  
ANK3  
SPANXN4  
CLIC6  
FBXO6  
TMPRSS11A  
FAM76B  
FRK  
P3H2  
SMAD2  
PAXIP1  
TMEM155  
TTC16  
SCN5A  
EP300  
OR52N5  
HMCN2  
AHCY  
DPP10  
MPPRP  
SORT1  
FBLN2  
DGK1  
CILP2  
XDH  
TRIML2  
LMX1A  
PLPP6  
CFAP54  
KCNH8  
AXL  
PPFIA2  
MDFAC  
COL8A1  
NBEAL2  
MUC17  
KIAA1755  
SIM1  
LRP2  
PCDHA1  
FUT9  
CEP128  
TMEM249  
CC2D1A  
PTPRH  
SEMA3D  
SERTM1  
RUNX1T1  
PCDH17  
CCDC185  
TRPC6  
SIN3A  
ZNF649  
SFBMT2  
SYNE2  
CAPS2  
MYH11  
GANC  
SLC9A3R2  
SPTA1  
CSK  
ZNF732  
FREM1  
DLG1  
HSPG2  
FARP1  
AKAP6  
ZNF256  
ARHGAP15  
CFHR5  
HERC3  
SLITRK6  
NOVA1  
AEN  
SLC9A2  
SPOPL  
WWC2  
FPGT-TNNI3K  
PCDHGA1  
AIPL1  
EPN1  
AFF3  
PDPN  
SH3PXD2A  
CCDC173  
PEX5L  
OR5L2  
NTRK3  
OCEL1  
IGF2BP1  
MEPCE  
ZNF497  
ZFP36L2  
PDCD2L  
SLFN5  
FAM133A

# NP11, 202 variant genes

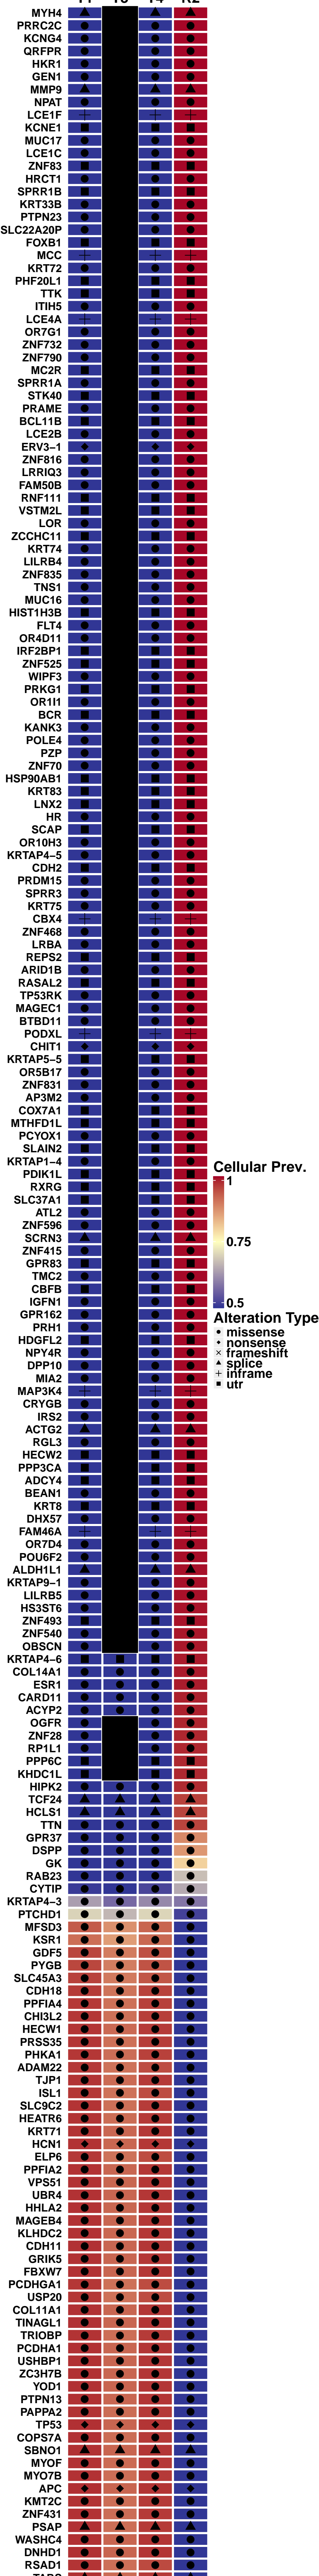

# NP12, 119 variant genes

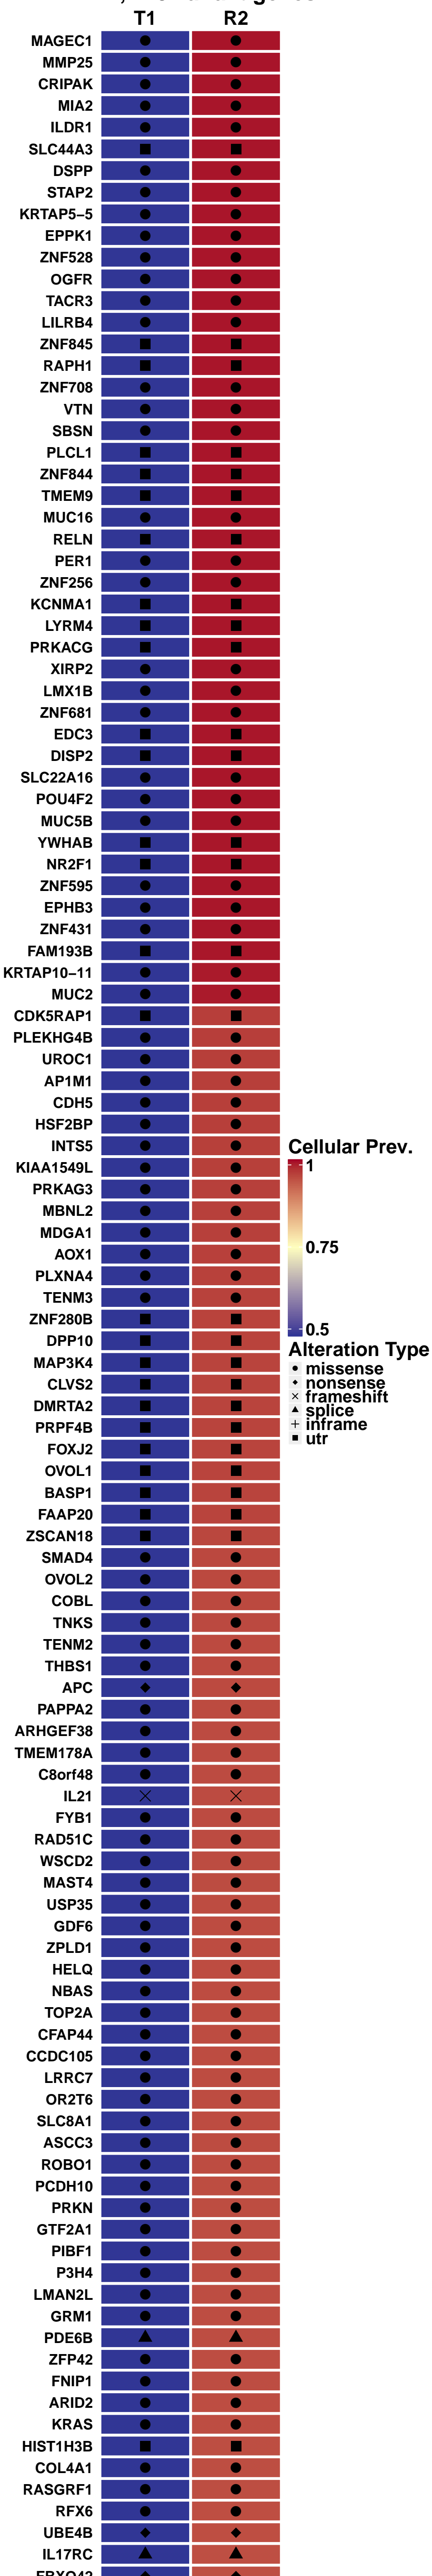

Cellular Prev.

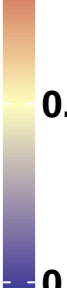

Alteration Type

- missense
- ◆ nonsense
- × frameshift
- ▲ splice
- + inframe
- utr

# NP14, 105 variant genes

T1 R2

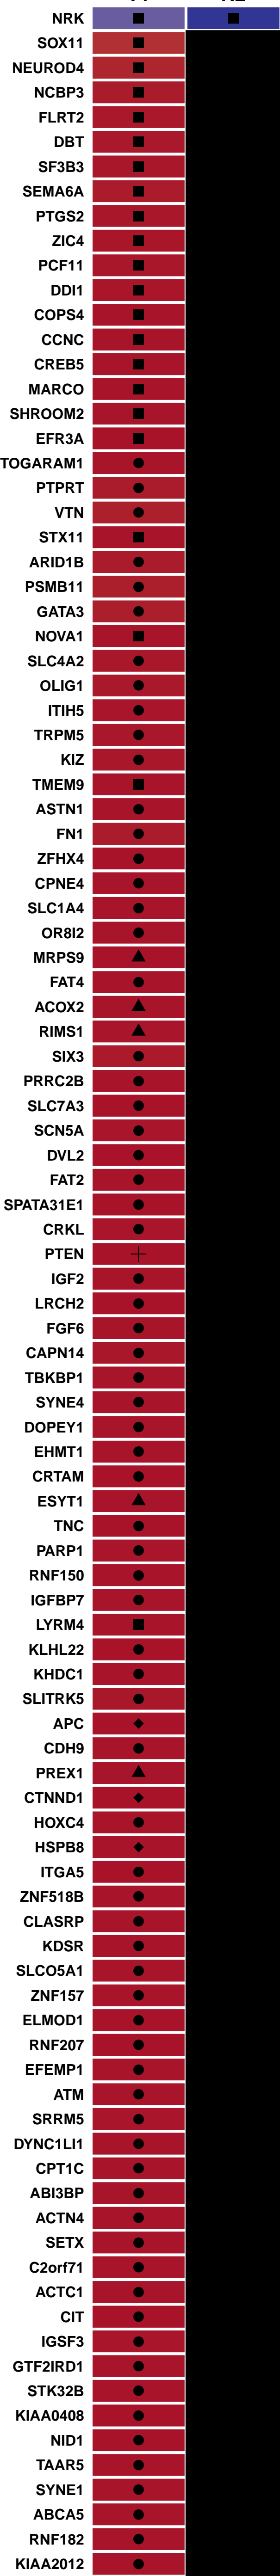

Cellular Prev.

1

0.75

0.5

Alteration Type

- missense
- ◆ nonsense
- × frameshift
- ▲ splice
- + inframe
- utr



# NP16, 129 variant genes

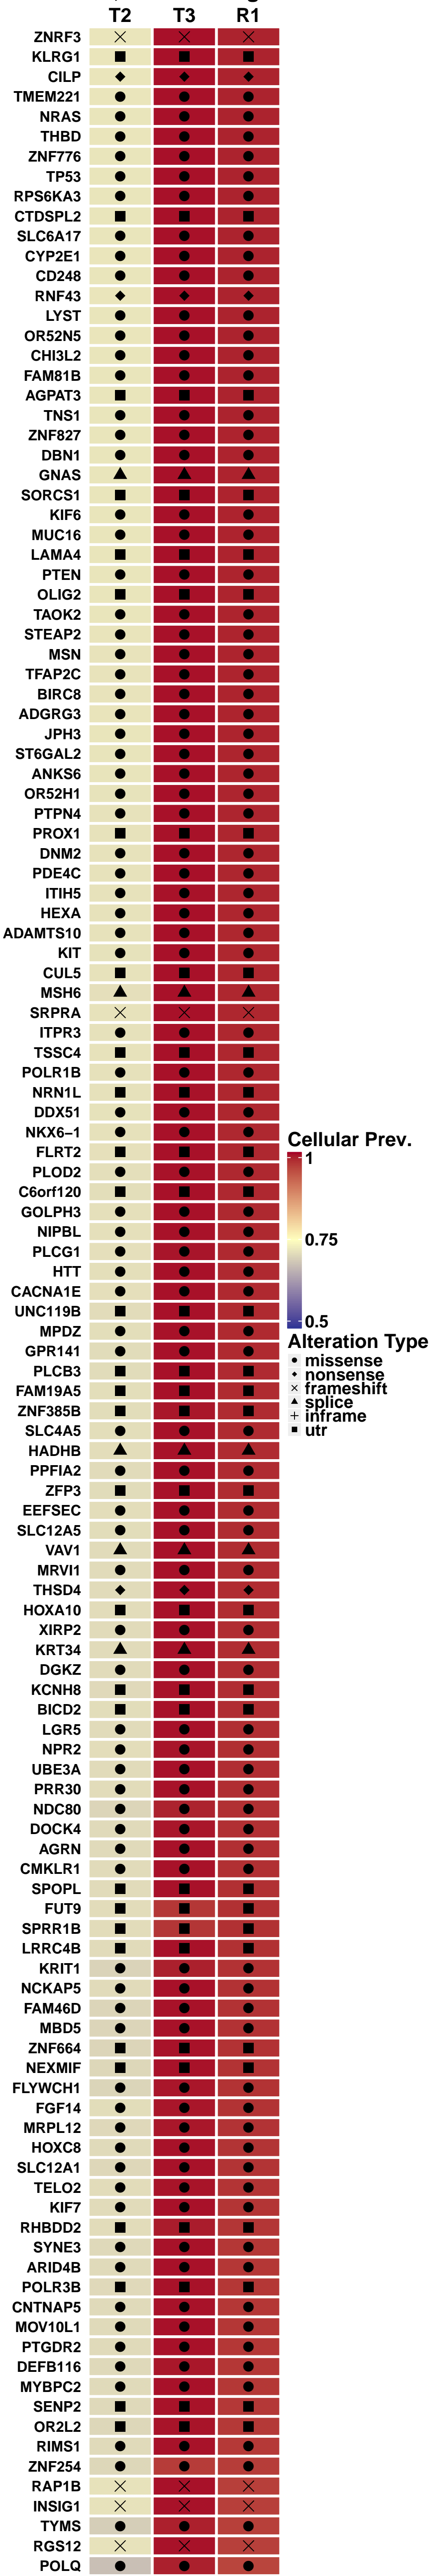

Cellular Prev. 1

0.75

0.5

Alteration Type

- missense
- ◆ nonsense
- × frameshift
- ▲ splice
- + inframe
- utr

# NP17, 130 variant genes

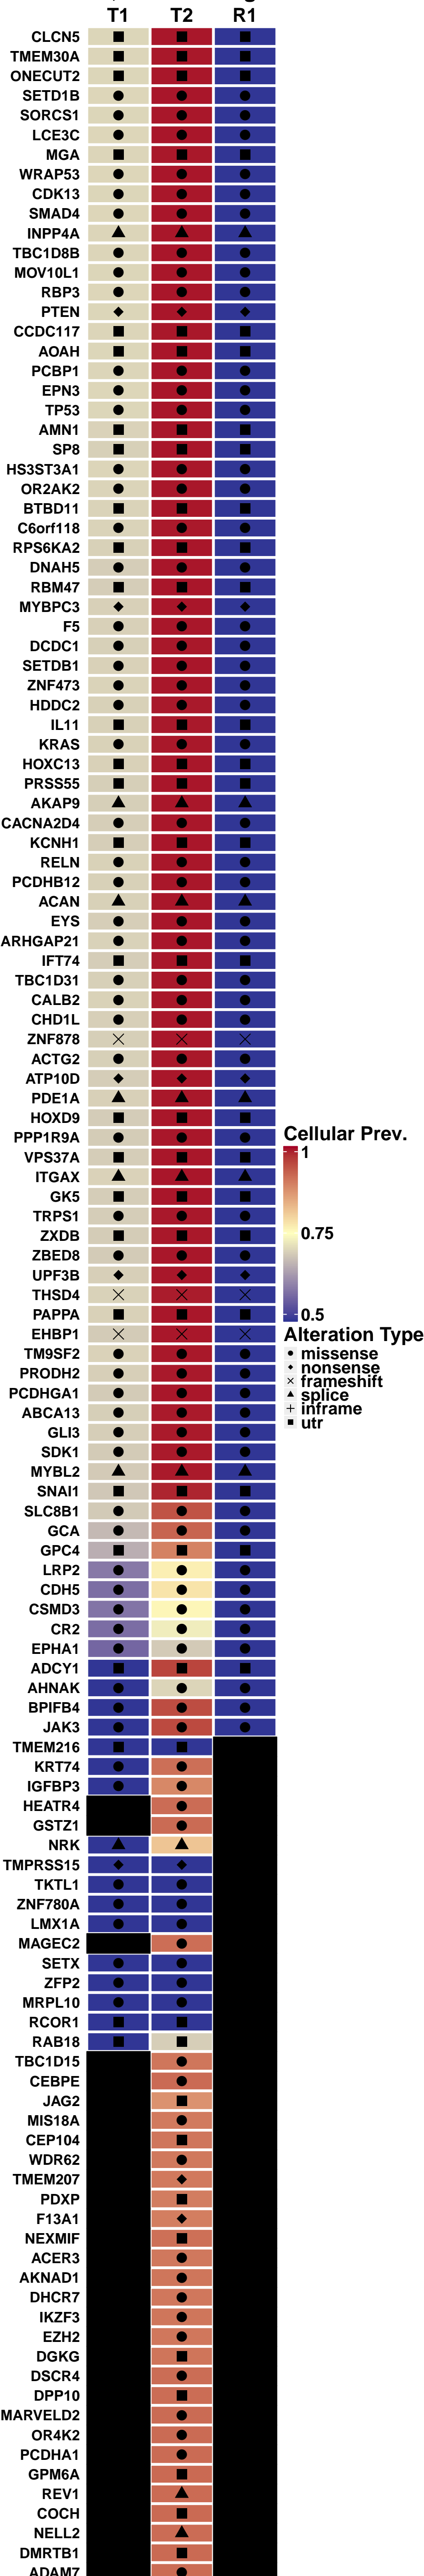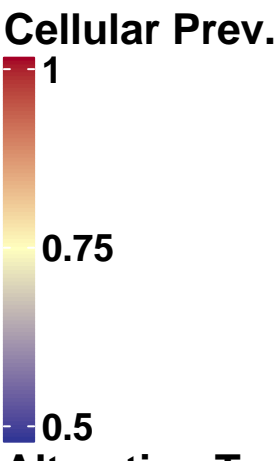

- Alteration Type**
- missense
  - ◆ nonsense
  - × frameshift
  - ▲ splice
  - + inframe
  - utr



# NP18, 46 variant genes

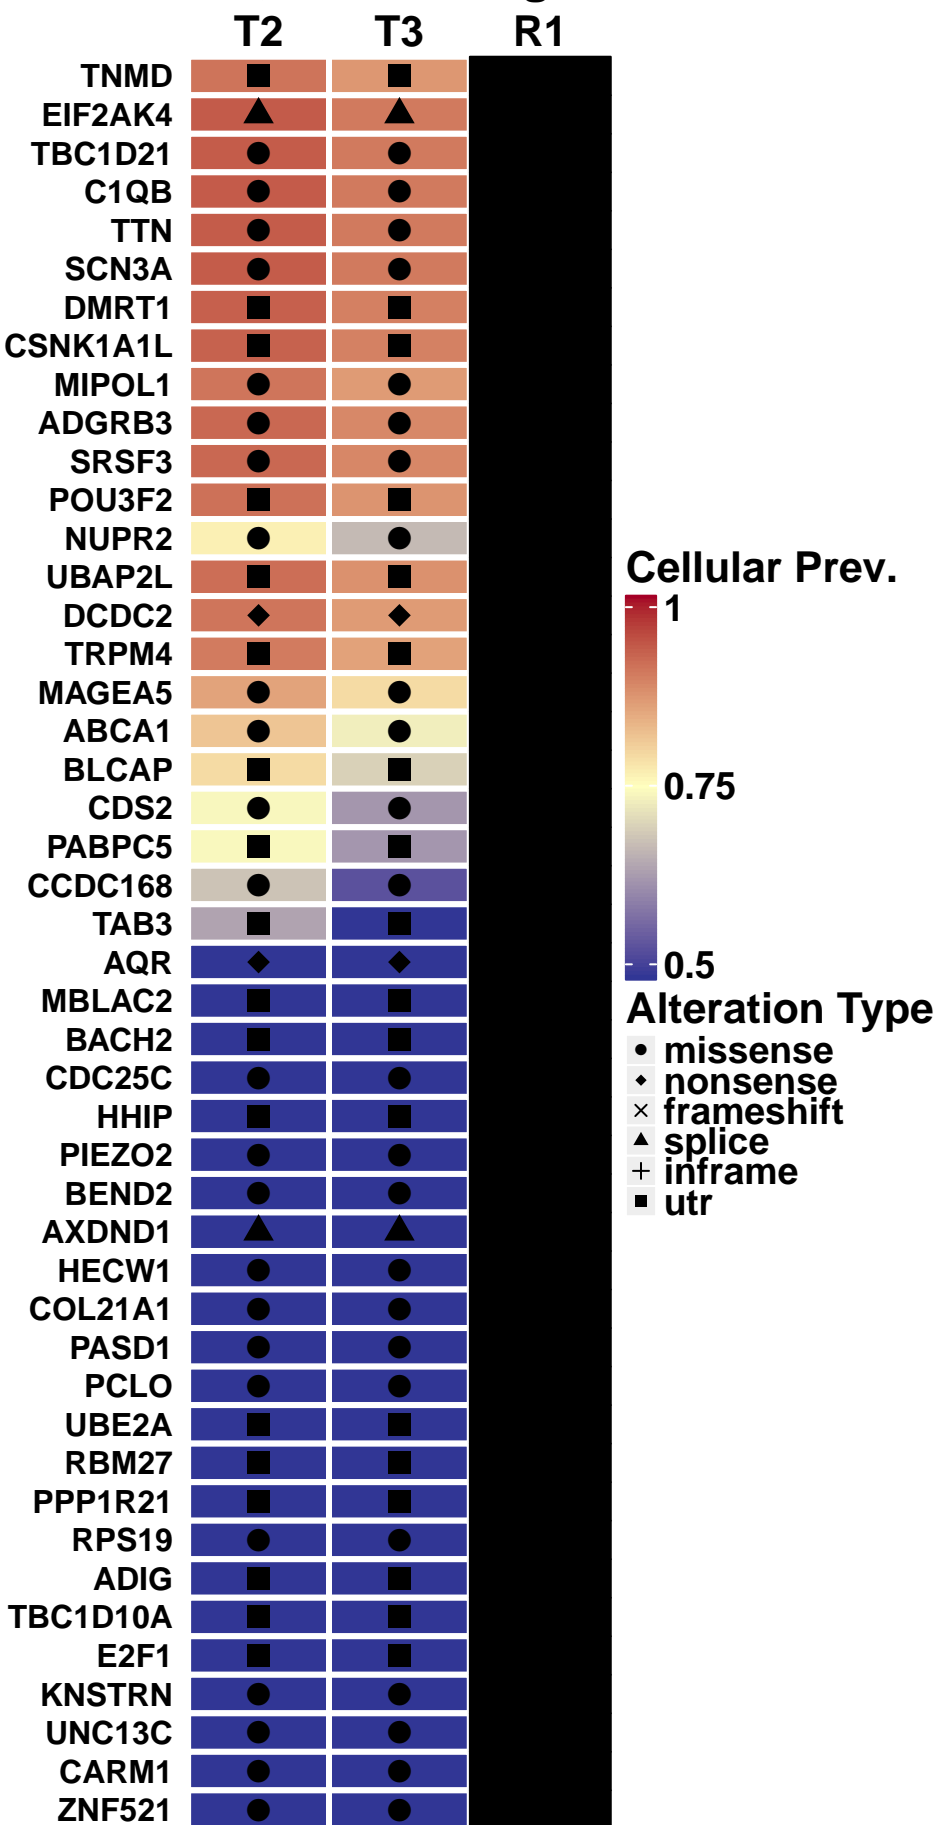

# NP19, 95 variant genes

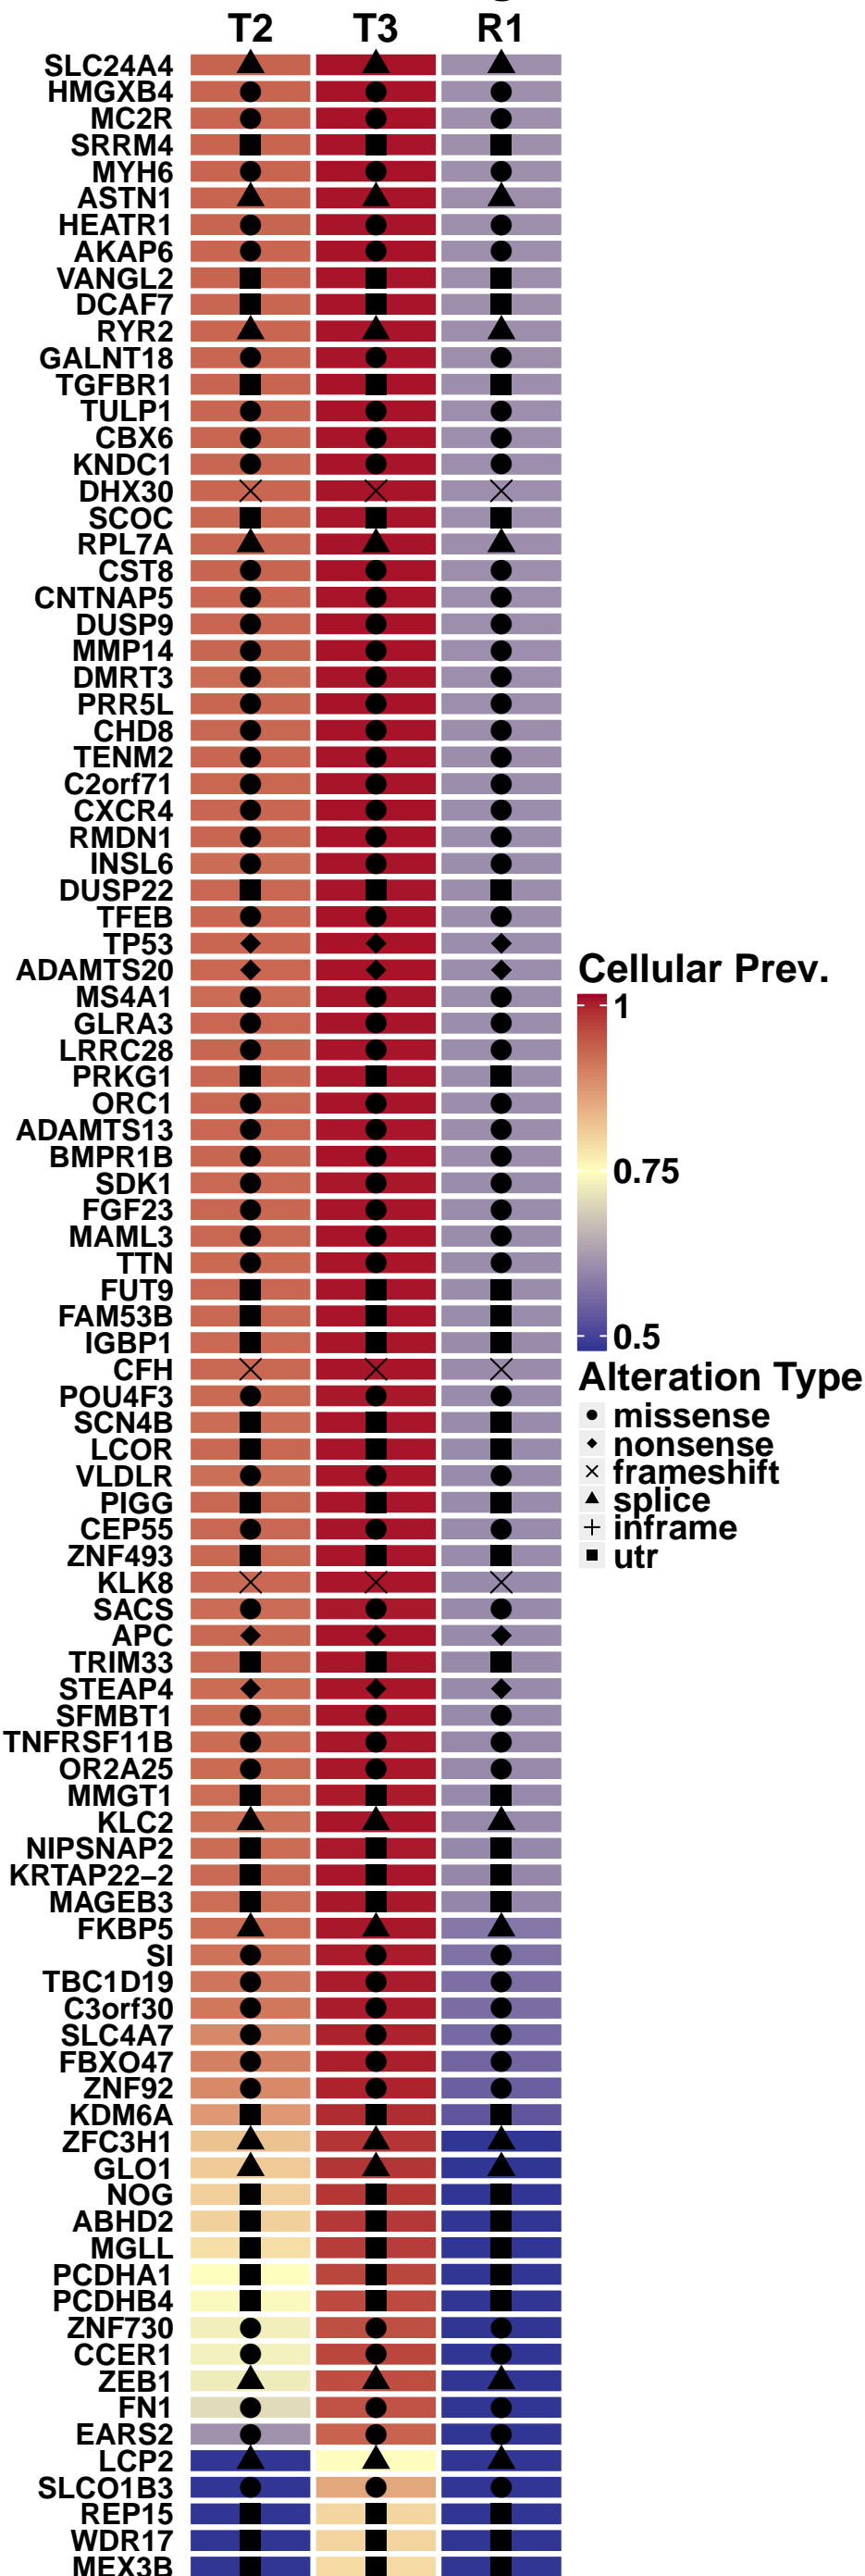

Supplement: mmc6.pdf [file mmc6.pdf]
